# Supplementary material for: Wounding-Induced VOC Emissions in Five Tropical Agricultural Species
Source: MDPI journal article supplement (doi:10.3390/molecules26092602), 2021-04-29
Supplement: s1 [file s1]

# Supplementary Material

**Table S1.** Average ( $\pm$  standard error;  $n = 3$ ) constitutive VOC emission rates [ $\text{nmol m}^{-2} \text{s}^{-1}$ ] in five tropical crop species measured by gas chromatography.

| Compound class                                      | Compound name           | Molecular formula                             | <i>Abelmoschus esculentus</i> | <i>Amaranthus cruentus</i> | <i>Amaranthus hybridus</i> | <i>Solanum aethiopicum</i> | <i>Telfairia occidentalis</i> |
|-----------------------------------------------------|-------------------------|-----------------------------------------------|-------------------------------|----------------------------|----------------------------|----------------------------|-------------------------------|
| <b>Lightweight oxygenated compounds (LOCs)</b>      | Acetaldehyde            | C <sub>2</sub> H <sub>4</sub> O               | 42 $\pm$ 22                   | 45 $\pm$ 23                | 55 $\pm$ 55                | 23 $\pm$ 23                | 48 $\pm$ 39                   |
|                                                     | Acetone                 | C <sub>3</sub> H <sub>6</sub> O               | 155 $\pm$ 65                  | 208 $\pm$ 91               | 70 $\pm$ 37                | 68 $\pm$ 53                | 105 $\pm$ 65                  |
| <b>Lipoxygenase pathway products (LOX products)</b> | 1-Penten-3-one          | C <sub>5</sub> H <sub>8</sub> O               | nd                            | nd                         | 3.5 $\pm$ 2.2              | 1.2 $\pm$ 1.2              | 3.8 $\pm$ 3.3                 |
|                                                     | Pentanal                | C <sub>5</sub> H <sub>10</sub> O              | 10 $\pm$ 8                    | 16 $\pm$ 5.7               | 20 $\pm$ 12                | nd                         | 3.0 $\pm$ 2.4                 |
|                                                     | 2-Pentanone             | C <sub>5</sub> H <sub>10</sub> O              | 7 $\pm$ 5                     | 2.4 $\pm$ 2.26             | 7.3 $\pm$ 2.1              | nd                         | 6.1 $\pm$ 3.9                 |
|                                                     | 1-Pentanol              | C <sub>5</sub> H <sub>12</sub> O              | nd                            | nd                         | 2.1 $\pm$ 1.7              | 3.9 $\pm$ 3.4              | 0.090 $\pm$ 0.085             |
|                                                     | 1-Penten-3-ol           | C <sub>5</sub> H <sub>12</sub> O              | nd                            | nd                         | 32 $\pm$ 16                | nd                         | nd                            |
|                                                     | (Z)-3-Hexen-1-ol        | C <sub>6</sub> H <sub>12</sub> O              | nd                            | nd                         | 21 $\pm$ 20                | nd                         | nd                            |
|                                                     | (E)-3-Hexen-1-ol        | C <sub>6</sub> H <sub>12</sub> O              | nd                            | nd                         | 2.2 $\pm$ 2.2              | nd                         | nd                            |
|                                                     | Hexanal                 | C <sub>6</sub> H <sub>12</sub> O              | 28 $\pm$ 12                   | 12 $\pm$ 12                | 34 $\pm$ 7.7               | 31 $\pm$ 15                | 30 $\pm$ 15                   |
|                                                     | (E)-1-hexanol           | C <sub>6</sub> H <sub>14</sub> O              | 38 $\pm$ 14                   | 44 $\pm$ 15                | 20 $\pm$ 6.5               | 11 $\pm$ 8.6               | 27 $\pm$ 14                   |
|                                                     | Heptanal                | C <sub>7</sub> H <sub>14</sub> O              | 14 $\pm$ 4.6                  | 21 $\pm$ 2.5               | 36 $\pm$ 18                | nd                         | 2.4 $\pm$ 1.9                 |
| <b>Fatty acid derived compounds</b>                 | Octanal                 | C <sub>8</sub> H <sub>16</sub> O              | 13 $\pm$ 3.3                  | 41 $\pm$ 5.7               | 41 $\pm$ 31                | nd                         | 3.2 $\pm$ 3.2                 |
|                                                     | Nonanal                 | C <sub>9</sub> H <sub>18</sub> O              | 42 $\pm$ 21                   | 93 $\pm$ 23                | 98 $\pm$ 77                | 15 $\pm$ 15                | 4.6 $\pm$ 2.9                 |
|                                                     | Decanal                 | C <sub>10</sub> H <sub>20</sub> O             | 92 $\pm$ 16                   | 40 $\pm$ 26                | 71 $\pm$ 61                | 2.4 $\pm$ 2.4              | 2.0 $\pm$ 2.0                 |
|                                                     | Benzaldehyde            | C <sub>8</sub> H <sub>8</sub> O <sub>2</sub>  | 10 $\pm$ 3.5                  | 34 $\pm$ 9.1               | 28 $\pm$ 4.9               | 19 $\pm$ 19                | 46 $\pm$ 21                   |
| <b>Benzenoids</b>                                   | 6-Methyl-5-hepten-2-one | C <sub>8</sub> H <sub>14</sub> O <sub>2</sub> | 48 $\pm$ 8                    | 20 $\pm$ 4.4               | 66 $\pm$ 41                | 45 $\pm$ 45                | 40 $\pm$ 37                   |
| <b>Geranylgeranyl diphosphate pathway</b>           | Geranyl acetone         | C <sub>13</sub> H <sub>22</sub> O             | 21 $\pm$ 13                   | 47 $\pm$ 29                | 24 $\pm$ 12                | nd                         | 3.2 $\pm$ 3.2                 |

|                                    |                        |                                   |          |             |             |             |           |
|------------------------------------|------------------------|-----------------------------------|----------|-------------|-------------|-------------|-----------|
| <b>Hemiterpene</b>                 | Isoprene               | C <sub>5</sub> H <sub>8</sub>     | 52 ± 21  | 110 ± 19    | 48 ± 35     | 43 ± 17     | 69 ± 43   |
| <b>Non-oxygenated monoterpenes</b> | Camphene               | C <sub>10</sub> H <sub>16</sub>   | nd       | 13 ± 5.3    | nd          | 0.92 ± 0.92 | 4.4 ± 3.9 |
|                                    | Δ <sup>3</sup> -Carene | C <sub>10</sub> H <sub>16</sub>   | nd       | 2.8 ± 2.8   | 58 ± 58     | 27 ± 19     | 80 ± 40   |
|                                    | p-Cymene               | C <sub>10</sub> H <sub>16</sub>   | nd       | 25 ± 17     | 9.5 ± 5.0   | 18 ± 14     | 6.2 ± 3.0 |
|                                    | Limonene               | C <sub>10</sub> H <sub>16</sub>   | 134 ± 25 | 26 ± 12     | 31 ± 10     | 14 ± 3.5    | 22 ± 11   |
|                                    | β-Myrcene              | C <sub>10</sub> H <sub>16</sub>   | nd       | nd          | nd          | 8.6 ± 8.6   | 4.9 ± 4.7 |
|                                    | (E)-β-ocimene          | C <sub>10</sub> H <sub>16</sub>   | nd       | 99 ± 49     | 54 ± 51     | 37 ± 37     | 3.1 ± 2.8 |
|                                    | α-Pinene               | C <sub>10</sub> H <sub>16</sub>   | 58 ± 21  | 69 ± 32     | 57 ± 19     | 5.0 ± 5.0   | 59 ± 30   |
|                                    | β-Pinene               | C <sub>10</sub> H <sub>16</sub>   | 18 ± 7   | 12 ± 6.0    | 22 ± 6.5    | 3.2 ± 3.3   | 12 ± 6.5  |
|                                    | α-Phellandrene         | C <sub>10</sub> H <sub>16</sub>   | nd       | nd          | nd          | 0.16 ± 0.15 | nd        |
|                                    | β-Phellandrene         | C <sub>10</sub> H <sub>16</sub>   | nd       | 4.3 ± 2.4   | 3.9 ± 2.4   | 2.4 ± 2.2   | 2.8 ± 1.4 |
|                                    | α-Terpinene            | C <sub>10</sub> H <sub>16</sub>   | 11 ± 5   | nd          | 0.15 ± 0.15 | nd          | nd        |
|                                    | (E)-Dihydrocarvone     | C <sub>10</sub> H <sub>16</sub> O | 12 ± 5   | nd          | nd          | nd          | nd        |
|                                    | Camphor                | C <sub>10</sub> H <sub>16</sub> O | 68 ± 11  | nd          | nd          | nd          | nd        |
| <b>Oxygenated monoterpenes</b>     | β-Cyclocytral          | C <sub>10</sub> H <sub>16</sub> O | 36 ± 16  | nd          | nd          | nd          | nd        |
|                                    | 1,8-cineole            | C <sub>10</sub> H <sub>18</sub> O | nd       | 0.49 ± 0.49 | nd          | nd          | nd        |
|                                    | Linalool               | C <sub>10</sub> H <sub>18</sub> O | 32 ± 14  | nd          | nd          | nd          | nd        |
|                                    | α-Terpineol            | C <sub>10</sub> H <sub>18</sub> O | 18 ± 6   | nd          | nd          | nd          | nd        |
|                                    | Cubebene               | C <sub>15</sub> H <sub>24</sub>   | 26 ± 12  | nd          | nd          | nd          | nd        |
| <b>Sesquiterpenes</b>              | (E)-β-Farnesene        | C <sub>15</sub> H <sub>24</sub>   | nd       | 40 ± 20     | nd          | 5.1 ± 2.9   | 5.2 ± 2.7 |
|                                    | Longifolene            | C <sub>15</sub> H <sub>24</sub>   | nd       | nd          | nd          | 2.4 ± 2.4   | nd        |
|                                    | Aromadendrene          | C <sub>15</sub> H <sub>24</sub>   | nd       | nd          | 0.96 ± 0.96 | nd          | nd        |

nd: not detected
